# Supplementary material
Source: publisher site journal article supplement (https://www.dovepress.com/article/370867)
Supplement: Supplementary file 1 [file get_supplementary_file.php]

| **Supplementary table 1:** Difference between male and female in baseline variables and responses of questions. | | | | | |
| --- | --- | --- | --- | --- | --- |
| **Variables** | **N** | **Overall**, N = 702*1* | **Gender** | | **p-value***2* |
| **Female**, N = 443*1* | **Male**, N = 259*1* |
| **The teaching is student cantered** | 669 |  |  |  | 0.3 |
| Agree |  | 431 (64.4%) | 275 (65.8%) | 156 (62.2%) |  |
| Disagree |  | 238 (35.6%) | 143 (34.2%) | 95 (37.8%) |  |
| **The teaching help to develop myself** | 697 |  |  |  | 0.2 |
| Agree |  | 473 (67.9%) | 306 (69.5%) | 167 (65.0%) |  |
| Disagree |  | 224 (32.1%) | 134 (30.5%) | 90 (35.0%) |  |
| **Iam clear about learning objective of modules and lectures** | 683 |  |  |  | 0.5 |
| Agree |  | 348 (51.0%) | 223 (52.0%) | 125 (49.2%) |  |
| Disagree |  | 335 (49.0%) | 206 (48.0%) | 129 (50.8%) |  |
| **The technology is used to delivered information in classroom** | 690 |  |  |  | 0.2 |
| Agree |  | 386 (55.9%) | 251 (58.0%) | 135 (52.5%) |  |
| Disagree |  | 304 (44.1%) | 182 (42.0%) | 122 (47.5%) |  |
| **Students are actively involved in planning and choice** | 691 |  |  |  | **0.032*** |
| Agree |  | 285 (41.2%) | 194 (44.3%) | 91 (36.0%) |  |
| Disagree |  | 406 (58.8%) | 244 (55.7%) | 162 (64.0%) |  |
| **Teachers have good communication skills** | 689 |  |  |  | 0.058 |
| Agree |  | 354 (51.4%) | 234 (54.2%) | 120 (46.7%) |  |
| Disagree |  | 335 (48.6%) | 198 (45.8%) | 137 (53.3%) |  |
| **Teachers give clear examples** | 689 |  |  |  | 0.3 |
| Agree |  | 400 (58.1%) | 257 (59.5%) | 143 (55.6%) |  |
| Disagree |  | 289 (41.9%) | 175 (40.5%) | 114 (44.4%) |  |
| **Teachers are prepared for class** | 683 |  |  |  | 0.14 |
| Agree |  | 427 (62.5%) | 276 (64.6%) | 151 (59.0%) |  |
| Disagree |  | 256 (37.5%) | 151 (35.4%) | 105 (41.0%) |  |
| **Seniors helps effectively in learning process** | 698 |  |  |  | 0.2 |
| Agree |  | 542 (77.7%) | 349 (79.3%) | 193 (74.8%) |  |
| Disagree |  | 156 (22.3%) | 91 (20.7%) | 65 (25.2%) |  |
| **Atmosphere is relax during (lab/DR/lecture/rounds)...12** | 694 |  |  |  | >0.9 |
| Agree |  | 174 (25.1%) | 110 (25.2%) | 64 (24.8%) |  |
| Disagree |  | 520 (74.9%) | 326 (74.8%) | 194 (75.2%) |  |
| **Atmosphere is relax during (lab/DR/lecture/rounds)...13** | 477 |  |  |  |  |
| Lab |  | 219 (45.9%) | 130 (44.4%) | 89 (48.4%) | 0.4 |
| DR |  | 336 (70.4%) | 203 (69.3%) | 133 (72.3%) | 0.5 |
| Lecture |  | 265 (55.6%) | 151 (51.5%) | 114 (62.0%) | **0.026*** |
| Rounds |  | 230 (48.2%) | 131 (44.7%) | 99 (53.8%) | 0.053 |
| **Atmosphere is relax during seminars/tutorial** | 675 |  |  |  | 0.8 |
| Agree |  | 320 (47.4%) | 203 (47.9%) | 117 (46.6%) |  |
| Disagree |  | 355 (52.6%) | 221 (52.1%) | 134 (53.4%) |  |
| **I can memorize all that i need to** | 674 |  |  |  | **0.026*** |
| Agree |  | 187 (27.7%) | 104 (24.8%) | 83 (32.7%) |  |
| Disagree |  | 487 (72.3%) | 316 (75.2%) | 171 (67.3%) |  |
| **My problem solving skills are being well develop** | 676 |  |  |  | 0.8 |
| Agree |  | 420 (62.1%) | 261 (61.8%) | 159 (62.6%) |  |
| Disagree |  | 256 (37.9%) | 161 (38.2%) | 95 (37.4%) |  |
| **Iam too tired to enjoy lectures** | 684 |  |  |  | 0.2 |
| Agree |  | 452 (66.1%) | 292 (67.9%) | 160 (63.0%) |  |
| Disagree |  | 232 (33.9%) | 138 (32.1%) | 94 (37.0%) |  |
| **My curriculum enhance patients management skills** | 655 |  |  |  | 0.6 |
| Agree |  | 402 (61.4%) | 254 (62.1%) | 148 (60.2%) |  |
| Disagree |  | 253 (38.6%) | 155 (37.9%) | 98 (39.8%) |  |
| **My curriculum enhance communication skills** | 681 |  |  |  | 0.2 |
| Agree |  | 457 (67.1%) | 295 (68.8%) | 162 (64.3%) |  |
| Disagree |  | 224 (32.9%) | 134 (31.2%) | 90 (35.7%) |  |
| **My curriculum enhance research skills** | 681 |  |  |  | 0.7 |
| Agree |  | 297 (43.6%) | 188 (44.1%) | 109 (42.7%) |  |
| Disagree |  | 384 (56.4%) | 238 (55.9%) | 146 (57.3%) |  |
| **Select My curriculum enhance research skills** | 378 |  |  |  |  |
| No data base |  | 200 (52.9%) | 129 (54.0%) | 71 (51.1%) | 0.6 |
| No research department |  | 260 (72.8%) | 155 (69.2%) | 105 (78.9%) | **0.045*** |
| No time |  | 203 (53.7%) | 139 (58.2%) | 64 (46.0%) | **0.023*** |
| Difficult access to data |  | 181 (47.9%) | 116 (48.5%) | 65 (46.8%) | 0.7 |
| No funds |  | 158 (41.8%) | 101 (42.3%) | 57 (41.0%) | 0.8 |
| **My curriculum enhance ability of teamwork** | 680 |  |  |  | 0.9 |
| Agree |  | 480 (70.6%) | 301 (70.8%) | 179 (70.2%) |  |
| Disagree |  | 200 (29.4%) | 124 (29.2%) | 76 (29.8%) |  |
| **My curriculum enhances independent learning skills** | 683 |  |  |  | 0.8 |
| Agree |  | 527 (77.2%) | 331 (77.5%) | 196 (76.6%) |  |
| Disagree |  | 156 (22.8%) | 96 (22.5%) | 60 (23.4%) |  |
| **My curriculum is more time consuming** | 679 |  |  |  | 0.5 |
| Agree |  | 477 (70.3%) | 295 (69.4%) | 182 (71.7%) |  |
| Disagree |  | 202 (29.7%) | 130 (30.6%) | 72 (28.3%) |  |
| **My curriculum is more stressful** | 684 |  |  |  | **0.01*** |
| Agree |  | 545 (79.7%) | 355 (82.8%) | 190 (74.5%) |  |
| Disagree |  | 139 (20.3%) | 74 (17.2%) | 65 (25.5%) |  |
| **Select My curriculum is more stressful** | 466 |  |  |  |  |
| Time is not enough |  | 296 (63.5%) | 210 (66.5%) | 86 (57.3%) | 0.056 |
| Environmental factor |  | 272 (58.4%) | 186 (58.9%) | 86 (57.3%) | 0.8 |
| Credit hours maldistributions |  | 127 (27.3%) | 81 (25.6%) | 46 (30.7%) | 0.3 |
| **I can ask questions when i need to** | 690 |  |  |  | 0.4 |
| Agree |  | 458 (66.4%) | 282 (65.1%) | 176 (68.5%) |  |
| Disagree |  | 232 (33.6%) | 151 (34.9%) | 81 (31.5%) |  |
| **The Exam achieve all the course objectives** | 688 |  |  |  | 0.9 |
| Agree |  | 305 (44.3%) | 192 (44.5%) | 113 (44.0%) |  |
| Disagree |  | 383 (55.7%) | 239 (55.5%) | 144 (56.0%) |  |
| *1*n (%) | | | | | |
| *2*Pearson's Chi-squared test  *** P values of 0.032, 0.026, 0.045, 0.023, and 0.01 are significant.** | | | | | |
